# Supplementary material
Source: MDPI journal article supplement (https://www.mdpi.com/2073-4395/10/1/44)

Figure S1

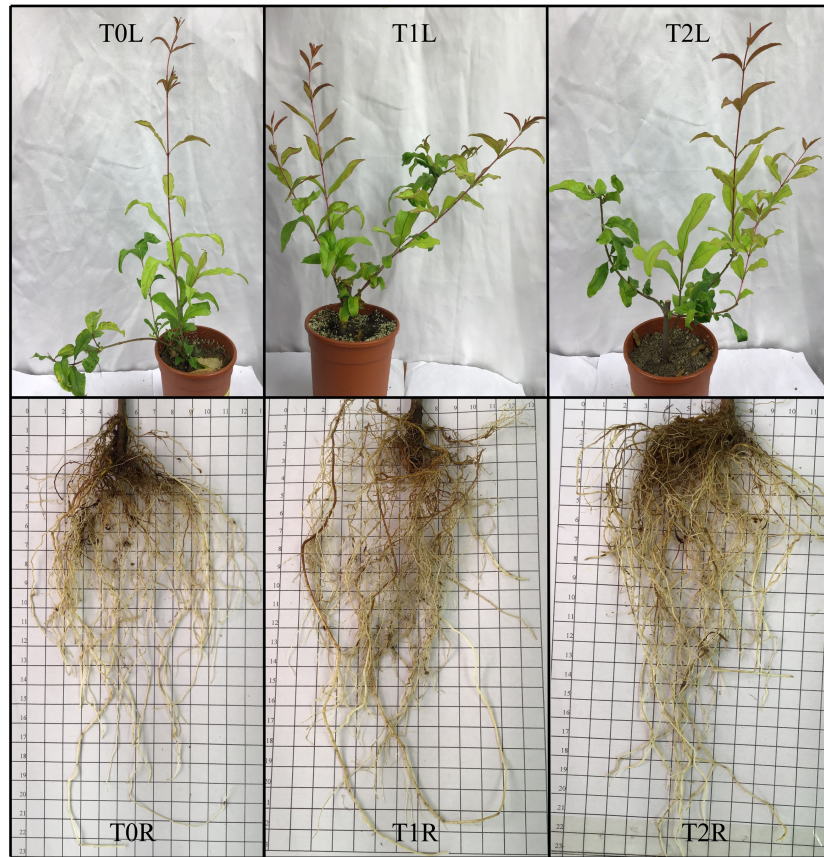

Figure S2

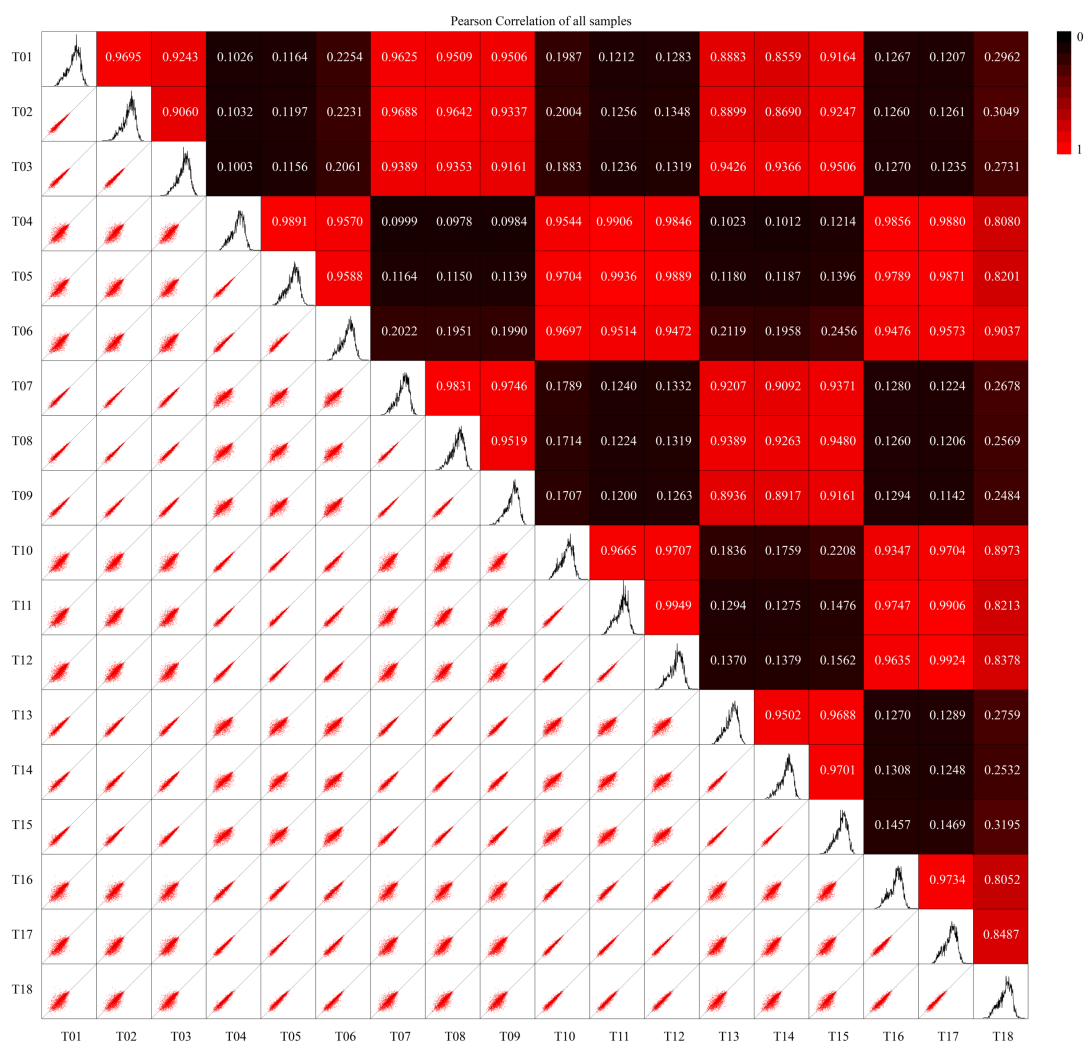

Figure S3

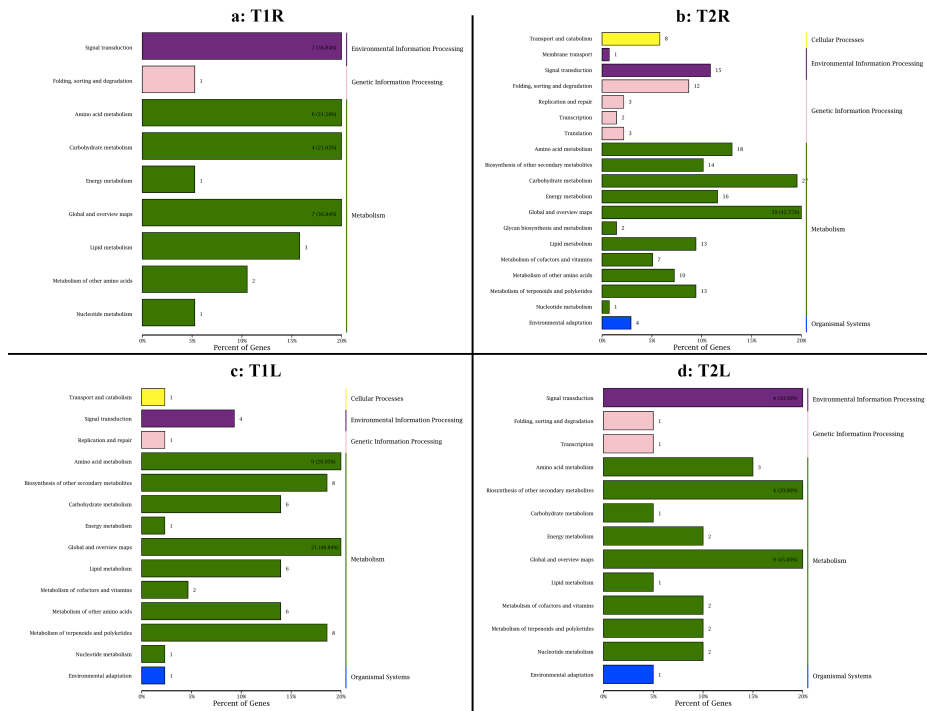

Figure S4

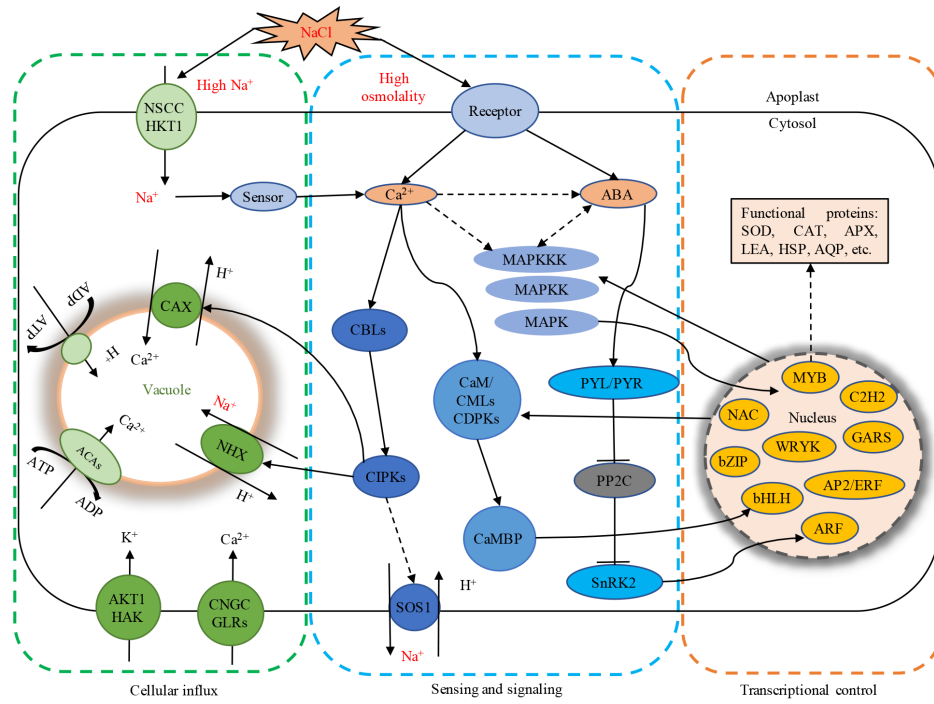

Supplement: s1 [file s1]
